# Supplementary material for: Detection of expanded RNA repeats using thermostable group II intron reverse transcriptase
Source: PubMed Central journal article supplement — Nucleic Acids Res. 2017 Oct 3;46(1):e1. doi: 10.1093/nar/gkx867 (PMC5758912; doi:10.1093/nar/gkx867), 2017-10-03

Supplemental Table 1

Table of exonic loci having  $\geq 25$  nt of CTG-CAG repeats expressed in human skeletal muscle.

The STR Catalog Viewer (42) was used to examine sequence data from the 1000 Genomes Project (41). Shown are 16 loci having (1)  $\geq 25$  nt of CTG-CAG repeats for the major allele in at least 100 genomes; (2)  $> 90\%$  purity of the repeat tract; (3) orientation of the repeat tract for expression of CUG repeats in an exon; and (4) absence of "A" nt interruptions (which are terminated by ddUTP). For repeats having bi-directional transcription, the listed gene is for the transcription unit expressing CUG-repeats. To estimate relative expression of CUG-repeats from each locus, the size of the major allele size was multiplied by reads per kilobase of transcript per million mapped reads from 430 muscle samples in GTEx data (43).

| Chromosome | Size of major allele in 1000 genomes | Frequency of heterozygosity in 1000 genomes | Presence of "A" interruption | RPKM in skeletal muscle in GTEx | Relative CUG-repeat expression | CUG expression for exonic repeats | Gene    |
|------------|--------------------------------------|---------------------------------------------|------------------------------|---------------------------------|--------------------------------|-----------------------------------|---------|
| chr1       | 32                                   | 0.0489                                      | +                            | 1.2                             | 1.2                            | 38.4                              | PTBP2   |
| chr2       | 31                                   | 0.1627                                      |                              | 0.03                            | 0.03                           | 0.93                              | PDCD1   |
| chr2       | 26                                   | 0.344                                       |                              | 0.01                            | 0.01                           | 0.26                              | GALNT5  |
| chr6       | 29                                   | 0.7029                                      |                              | 3.4                             | 3.4                            | 98.6                              | NOTCH4  |
| chr6       | 27                                   | 0.2087                                      |                              | 3.4                             | 3.4                            | 91.8                              | CNPY3   |
| chr7       | 34                                   | 0.0827                                      |                              | 52                              | 52                             | 1768                              | BZW2    |
| chr7       | 25                                   | 0.1853                                      |                              | 4.5                             | 4.5                            | 112.5                             | BPGM    |
| chr8       | 25                                   | 0.2271                                      |                              | 3.8                             | 3.8                            | 95                                | ZNF395  |
| chr8       | 25                                   | 0.1067                                      | +                            | 0.1                             | 0.1                            | 2.5                               | PXDNL   |
| chr11      | 26                                   | 0.4082                                      |                              | 0.6                             | 0.6                            | 15.6                              | DCHS1   |
| chr16      | 47                                   | 0.6504                                      |                              | 0.02                            | 0.02                           | 0.94                              | JPH3    |
| chr17      | 25                                   | 0.1053                                      |                              | 1.9                             | 1.9                            | 47.5                              | GHDC    |
| chr18      | 25                                   | 0.422                                       |                              | 0.4                             | 0.4                            | 10                                | LDLRAD4 |
| chr19      | 17                                   | 0.6063                                      |                              | 42                              | 42                             | 714                               | DMPK    |
| chr19      | 25                                   | 0.5428                                      |                              | 9                               | 9                              | 225                               | FCGRT   |
| chr20      | 23                                   | 0.4621                                      |                              | 16.4                            | 16.4                           | 377.2                             | CTSA    |
| chrX       | 58                                   | 0.7303                                      |                              | 0.7                             | 0.7                            | 40.6                              | CASK    |

Supplemental Figure 1.

Diagram of transcripts produced by HSA<sup>NR</sup>, HSA<sup>XLR</sup>, and LC15 transgenic mice. Expression of HSA<sup>NR</sup> and HSA<sup>XLR</sup> is controlled by hACTA1 promoter. HSA<sup>NR</sup> transgene produces hACTA1 mRNA with a truncated 3' untranslated region (UTR). HSA<sup>XLR</sup> produces full-length hDMPK with a 3' UTR containing a (CTG)<sub>440</sub> repeat (green bar). The LC15 transgene consists of luciferase cDNA fused to the hDMPK 3' UTR containing a (CTG)<sub>220-400</sub> repeat (green bar).

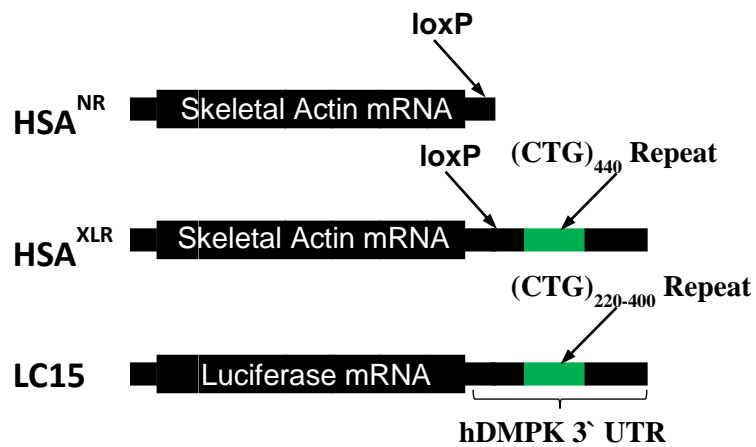

Supplemental Figure 2.

Diagrams of minigene constructs LC19-no repeat and LC21-(GGGGCC)<sub>160</sub>. Expression of luciferase is driven by the CMV-enhancer and chicken beta-actin promoter. The luciferase cDNA is fused to the 3' UTR of *DMPK* containing no repeats or (GGGGCC)<sub>160</sub> repeats. Stable transfection of N2a neuroblastoma cells was obtained by cotransfection with plasmid expressing phi C31 integrase.

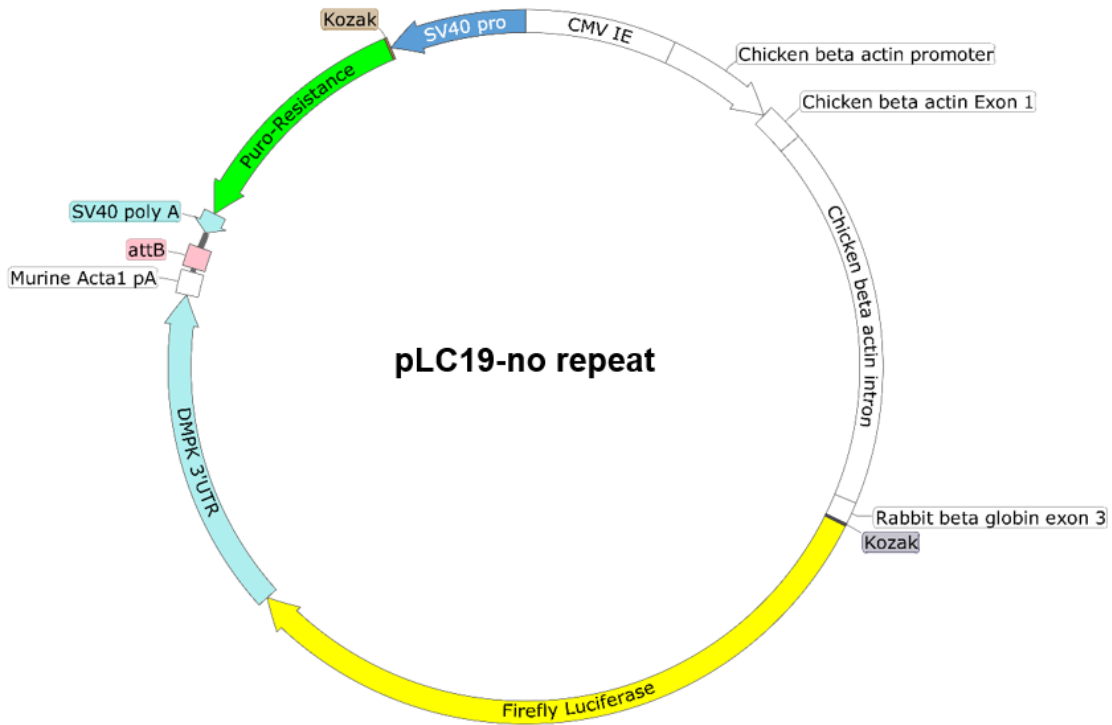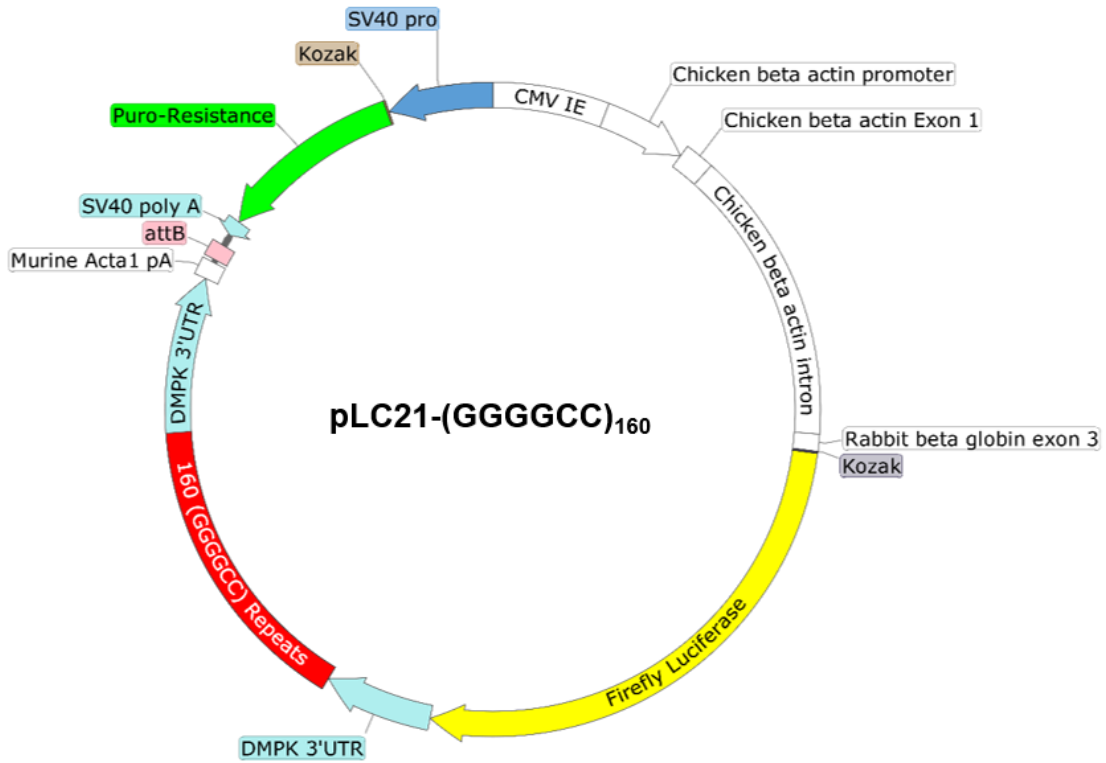

Supplemental Figure 3.

Polyacrylamide TBE-urea gel electrophoresis analysis cDNAs generated by TGIRT-III using r(CUG)<sub>100</sub> or r(GGGGCC)<sub>40</sub> templates. **(A)** Reverse transcription of r(CUG)<sub>100</sub> template was performed with end-labeled primer that anneals 3' of the repeat tract, in the presence (+CAG) or absence (-CAG) of RNA/DNA hybrid (CAG)<sub>6+1</sub> primers. Quantification of corresponding bands on the right. **(B)** As in (A), using r(GGGGCC)<sub>40</sub> template with (+CCCCGG) or without (-CCCCGG) RNA/DNA hybrid (GGCCCC)<sub>3+3</sub> primers.

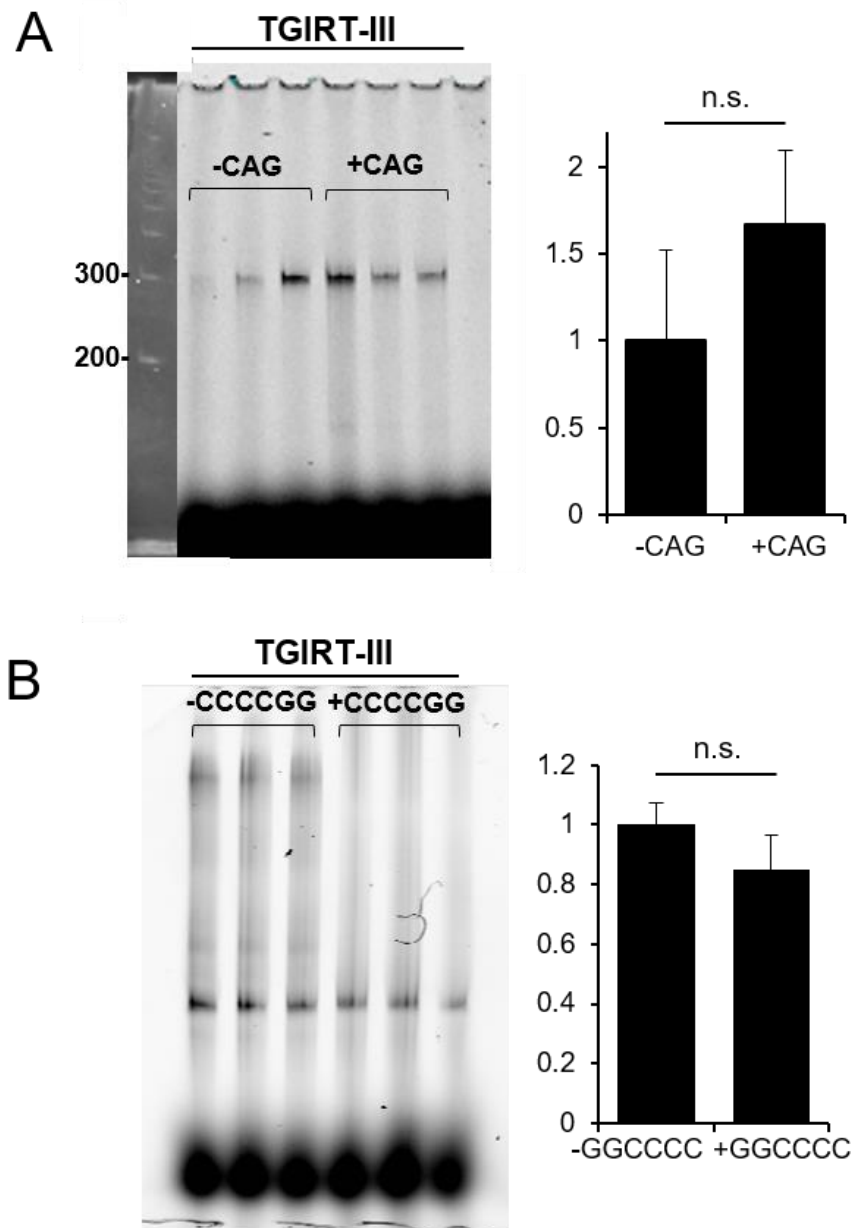

Supplemental Figure 4.

Reverse transcription of r(CUG)<sub>100</sub> with RNA/DNA hybrid primers. Representative chromatograms of 3' FAM-labeled cDNA products generated by TGIRT-III or SS-III using 5'-cagcagcagcagcagCAGC-3' (rna/DNA) primer and FAM-labeled ddUTP.

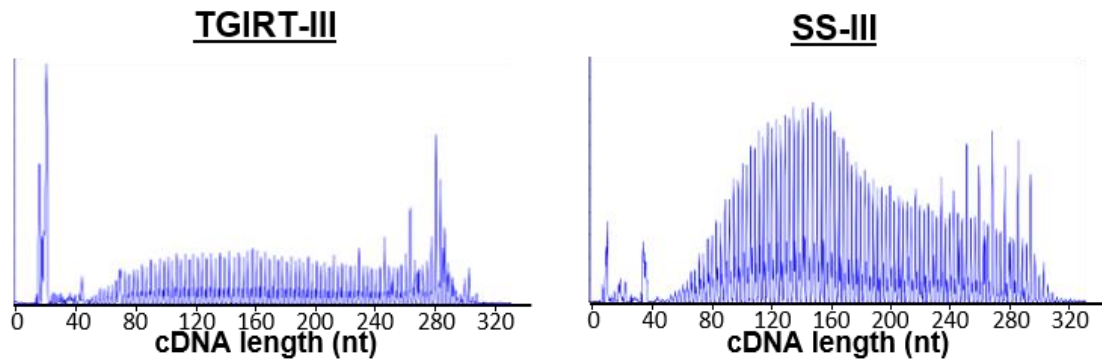

Supplement: gkx867_supp.pdf [file gkx867_supp.pdf]
